# Supplementary figures and images for: Pulmonary surfactant protein SP-D opsonises carbon nanotubes and augments their phagocytosis and subsequent pro-inflammatory immune response
Source: Royal Society of Chemistry journal article supplement (doi:10.1039/c6nr08807d), 2016-11-30

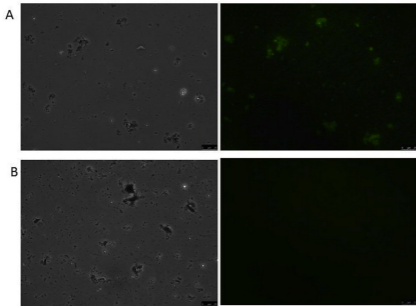

Supplement: c6nr08807d1.pdf [file c6nr08807d1.pdf]
